# Supplementary material for: The effect of computer-based cognitive flexibility training on recovery of executive function after stroke: rationale, design and methods of the TAPASS study
Source: PubMed Central journal article supplement (PMC4545547; doi:10.1186/s12883-015-0397-y), 2015-08-20
Supplement: 12883_2015_397_MOESM4_ESM.pdf [file 12883_2015_397_MOESM4_ESM.pdf]

## Additional file 4

### Measures at different time-points

| T0<br>Week 1                      | T1<br>Week 7, 19 <sup>a</sup> and 25 <sup>a</sup> | T2<br>Week 13                        | T3<br>Week 17 <sup>b</sup> / 29 <sup>a</sup> |
|-----------------------------------|---------------------------------------------------|--------------------------------------|----------------------------------------------|
| <b>Primary outcome measures</b>   |                                                   |                                      |                                              |
| D-Kefs TMT (1-5)                  |                                                   | D-Kefs TMT (2,3,4,5)                 |                                              |
| ToL (online)                      | ToL (online)                                      | ToL (online)                         | ToL (online)                                 |
| Letter-Number Sequencing          |                                                   | Letter-Number Sequencing             |                                              |
| Fluency                           |                                                   | Fluency                              |                                              |
| <b>Secondary outcome measures</b> |                                                   |                                      |                                              |
| Switch +dual task (online)        | Switch task (online)                              | Switch +dual task (online)           | Switch task (online)                         |
| TMT (online)                      | TMT (online)                                      | TMT (online)                         | TMT (online)                                 |
| DSST (online)                     | DSST (online)                                     | DSST (online)                        | DSST (online)                                |
| DSC                               |                                                   | DSC                                  |                                              |
| RAVLT                             |                                                   | RAVLT                                |                                              |
| N-back                            |                                                   | N-back                               |                                              |
| PASAT                             |                                                   | PASAT                                |                                              |
| Stop-signal task                  |                                                   | Stop-signal task                     |                                              |
| Recovery VAS                      |                                                   | Recovery VAS                         |                                              |
| MRI                               |                                                   | MRI                                  |                                              |
| O-span (online)                   |                                                   | O-span (online)                      |                                              |
| Corsi (online)                    | Corsi (online)                                    | Corsi (online)                       | Corsi (online)                               |
| CPM (online)                      |                                                   | CPM (online)                         |                                              |
| Shiplely (online)                 |                                                   | Shiplely (online)                    |                                              |
| DEX (online)                      | DEX (online)                                      | DEX (online)                         | DEX (online)                                 |
| CFQ (online)                      | CFQ (online)                                      | CFQ (online)                         | CFQ (online)                                 |
| USER-P (online)                   |                                                   | USER-P (online)                      |                                              |
| SF-36 (online)                    |                                                   | SF-36 (online)                       |                                              |
| IADL (online)                     |                                                   | IADL (online)                        |                                              |
| HADS (online)                     |                                                   | HADS (online)                        |                                              |
| CIS-F (online)                    |                                                   | CIS-F (online)                       |                                              |
| Proxy CFQ (online)                |                                                   | Proxy CFQ (online)                   |                                              |
| Proxy DEX (online)                |                                                   | Proxy DEX (online)                   |                                              |
| Proxy IADL (online)               |                                                   | Proxy IADL (online)                  |                                              |
|                                   | Subjective Training success (online)              | Subjective Training success (online) | Subjective Training success (online)         |
| Mouse skills (online)             | Mouse skills (online)                             | Mouse skills (online)                | Mouse skills (online)                        |
| TICS                              |                                                   |                                      |                                              |
| Demographic questions (online)    |                                                   |                                      |                                              |

Note. <sup>a</sup>Only done by waiting list group; <sup>b</sup>Only done by intervention and active control group; <sup>c</sup>Only done by subgroup of study sample; Shaded cells = done at home

| Abbreviation | Measure                                 |
|--------------|-----------------------------------------|
| D-Kefs TMT   | Delis- Kaplan Executive Function System |
| ToL          | Tower of London (Kralen puzzle)         |
| TMT          | Trail Making Test (Sporzoeken)          |

| Abbr. continued | Measure                                                      |
|-----------------|--------------------------------------------------------------|
| DSST            | Digit Symbol substitution Task                               |
| DSC             | Digit-Symbol-Coding                                          |
| RAVLT           | Rey Auditory Verbal Learning Task                            |
| PASAT           | Pased Auditory Serial Addition Test                          |
| MRI             | Magnetic Resonance Imaging                                   |
| O-span          | Operation span                                               |
| CPM             | Raven Coloured Progressive Matrices                          |
| DEX             | Dysexecutive Questionnaire                                   |
| CFQ             | Cognitive Failure Questionnaire                              |
| USER-P          | Utrechtse Schaal voor Evaluatie en Revalidatie- Participatie |
| SF-36           | Short Form Health Survey                                     |
| IADL            | Instrumental activity of daily life scale                    |
| HADS            | Hospital Anxiety Depression Scale                            |
| CIS-F           | Checklist Individual Strength- Fatigue subscale              |
| TICS            | Telephone Interview Cognitive Status                         |
